# Supplementary figures and images for: Short Peptides of Innate Immunity Protein Tag7 (PGLYRP1) Selectively Induce Inhibition or Activation of Tumor Cell Death via TNF Receptor
Source: Preprints.org preprint supplement (doi:10.20944/preprints202306.1694.v1), 2023-06-23

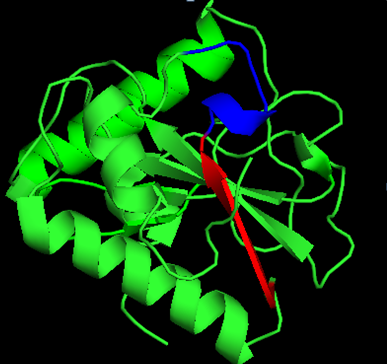


3D-structure of Tag7 (PGLYRP1, PDB-1YCK) protein. 17.1A – red, 17.1В – blue

Supplement: Supplementary file 2 [file supplementary]
